# Supplementary figures and images for: Theoretical investigation of the charge-transfer properties in different meso-linked zinc porphyrins for highly efficient dye-sensitized solar cells
Source: Royal Society of Chemistry journal article supplement (doi:10.1039/c4dt00665h), 2014-01-01

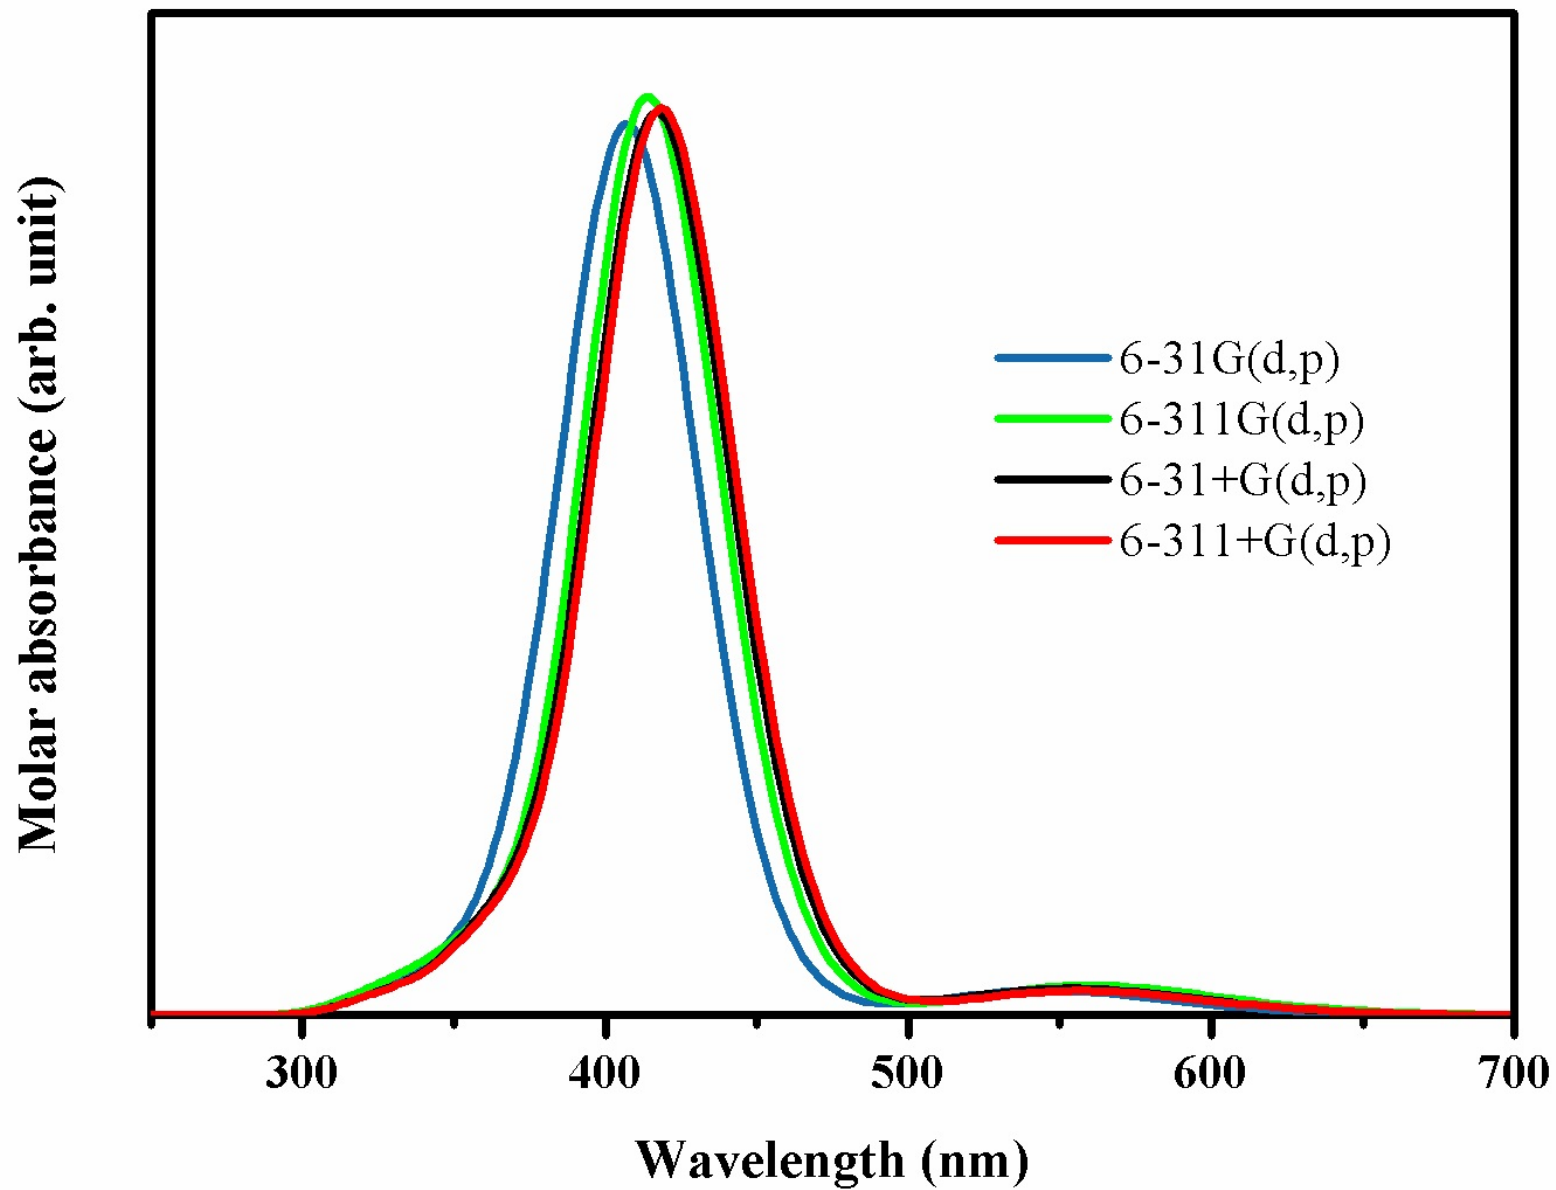

Supplement: c4dt00665h2.pdf [file c4dt00665h2.pdf]

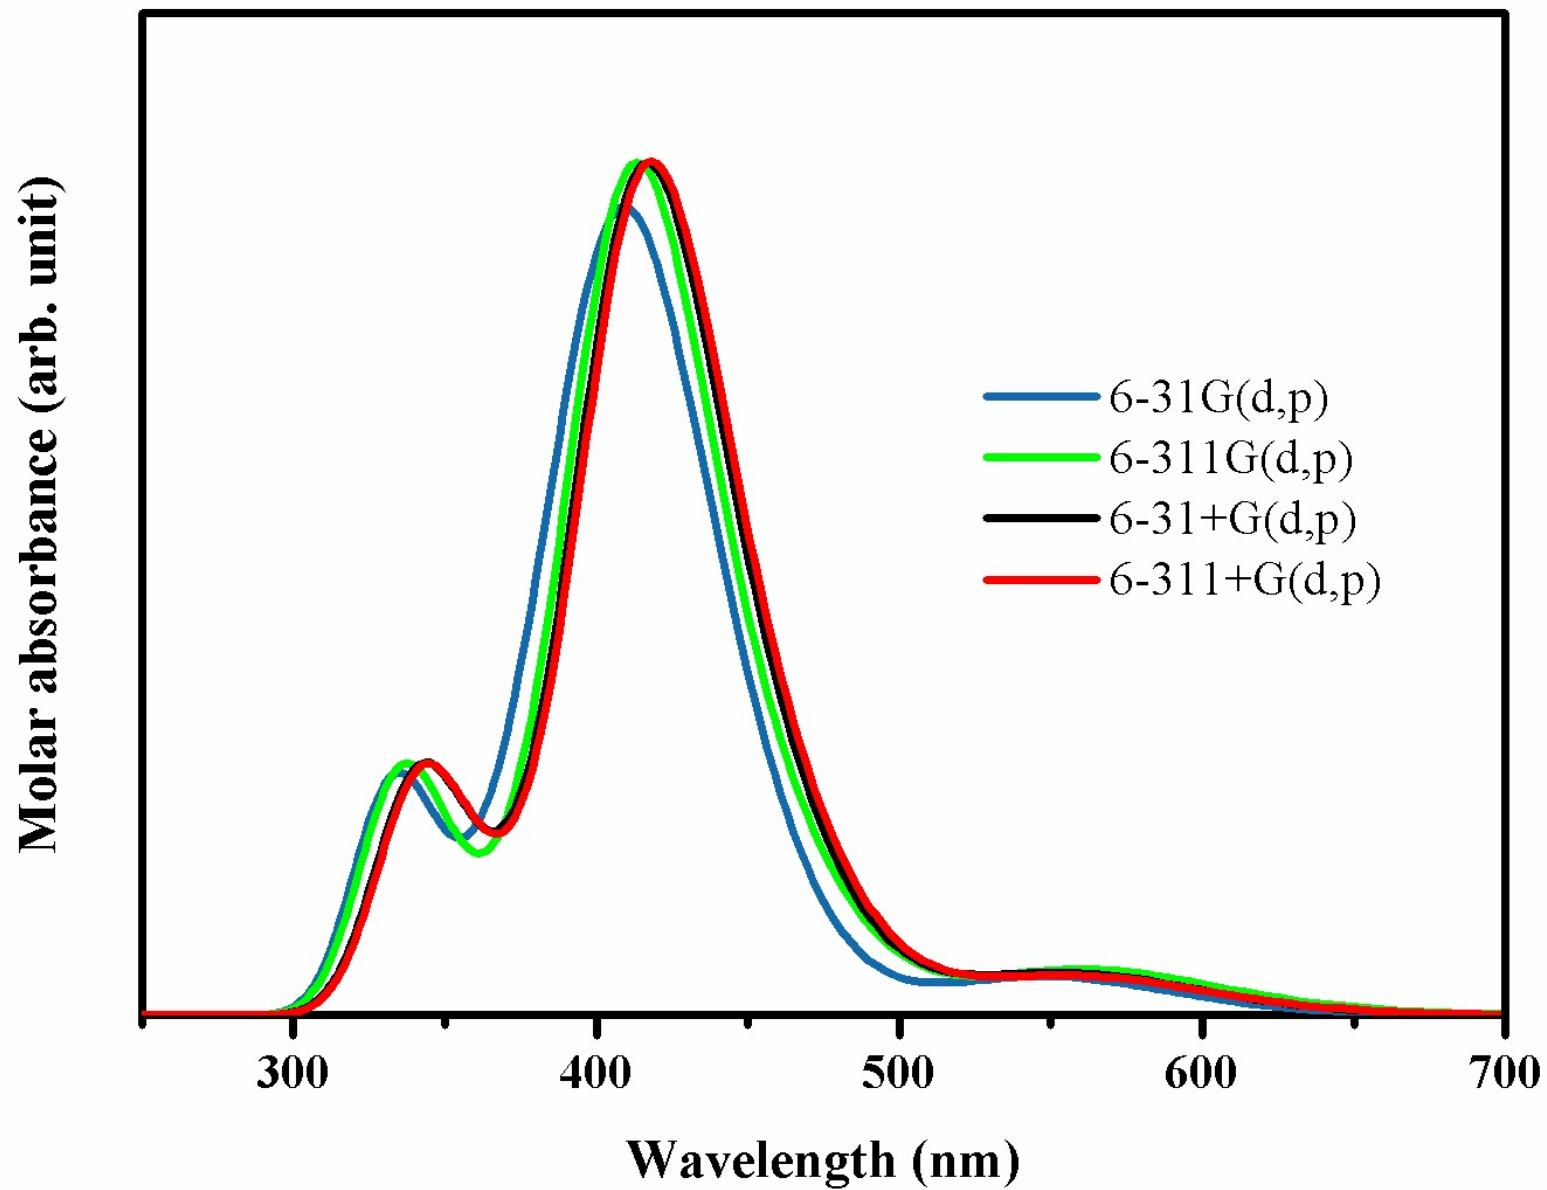

Supplement: c4dt00665h3.pdf [file c4dt00665h3.pdf]

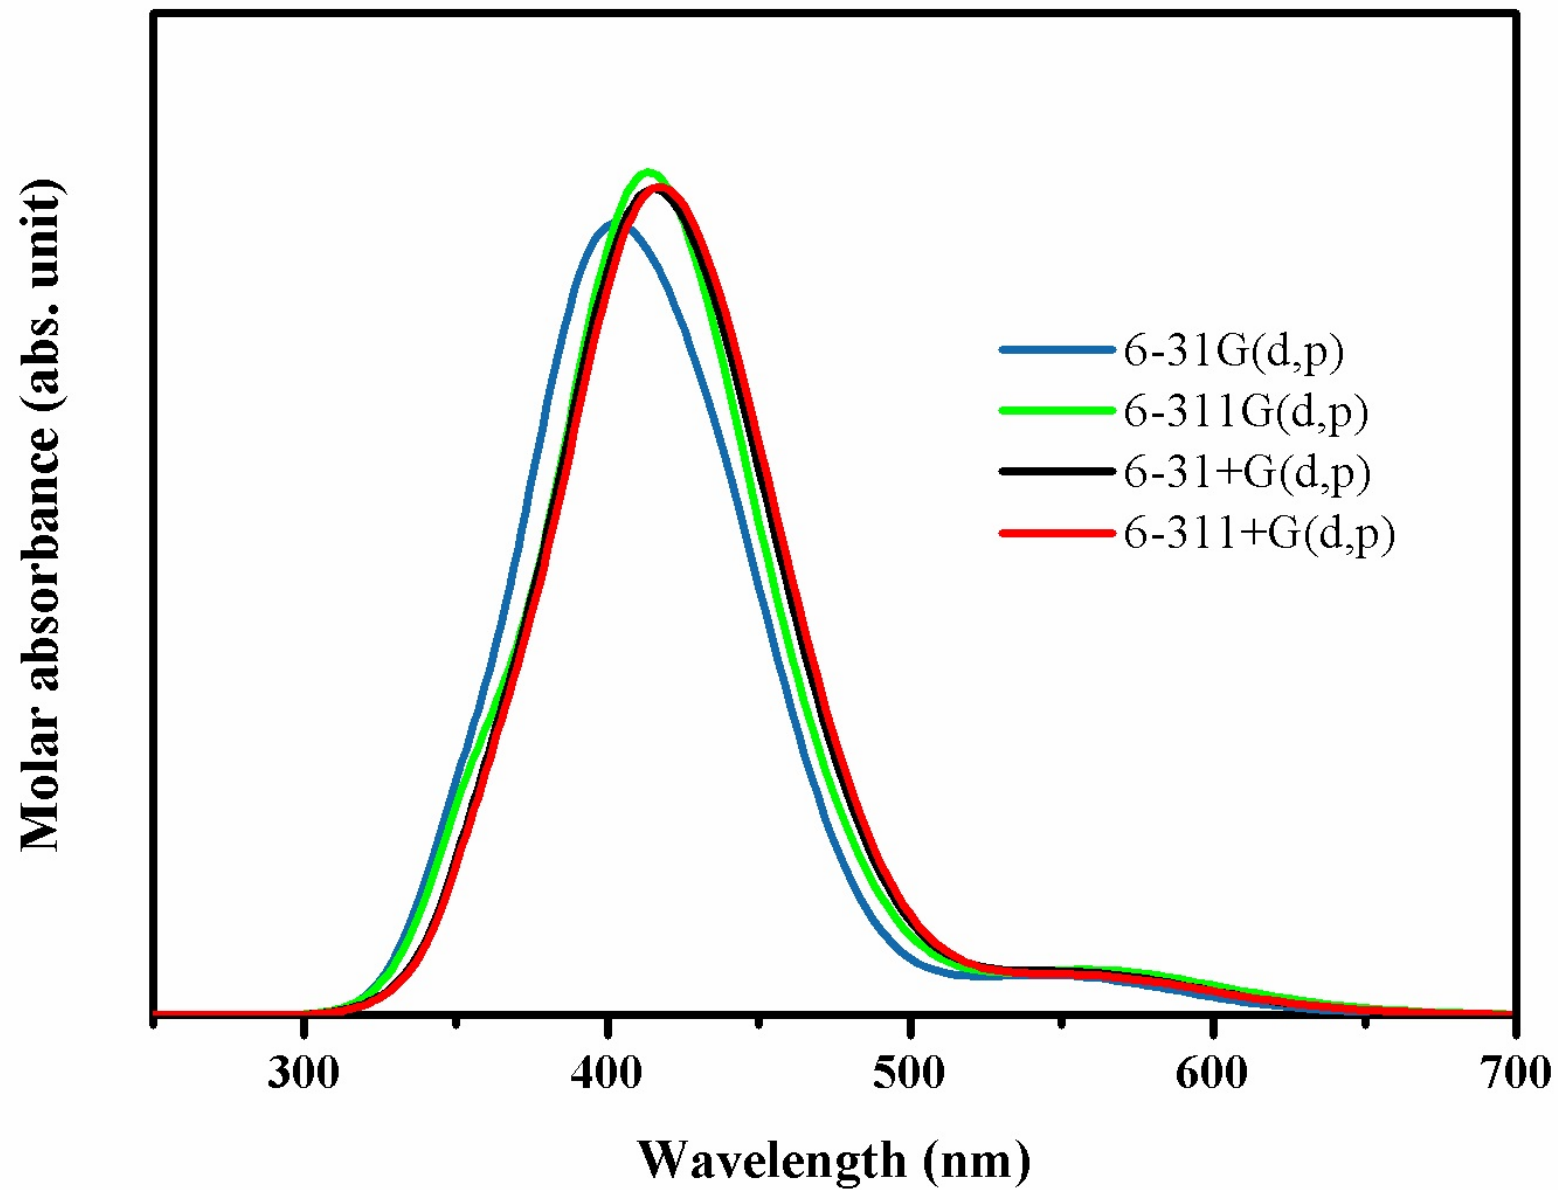

Supplement: c4dt00665h4.pdf [file c4dt00665h4.pdf]
